# Supplementary material for: Therapeutic potential of fibrinogen γ-chain peptide-coated, ADP-encapsulated liposomes as a haemostatic adjuvant for post-cardiopulmonary bypass coagulopathy
Source: PubMed Central journal article supplement (PMC7347858; doi:10.1038/s41598-020-68307-5), 2020-07-09
Supplement: 41598_2020_68307_MOESM1_ESM.pdf [file 41598_2020_68307_MOESM1_ESM.pdf]

**Therapeutic potential of fibrinogen  $\gamma$ -chain peptide-coated, ADP-encapsulated liposomes as a hemostatic adjuvant for post-cardiopulmonary bypass coagulopathy**

Osamu Ishida, Kohsuke Hagsawa, Nozomu Yamanaka, Koji Tsutsumi, Hidenori Suzuki, Shinji Takeoka and Manabu Kinoshita

## Results of evaluation for characteristics of H12-ADP-liposome

| Liposome composition (molar ratio)                                             |                        |                           |                      |                         |                   |
|--------------------------------------------------------------------------------|------------------------|---------------------------|----------------------|-------------------------|-------------------|
| DPPC/Cholesterol/DHSG/PEG-DSPE/H12-PEG-Glu2C18 = 5.000/5.066/1.157/0.022/0.042 |                        |                           |                      |                         |                   |
| Size (nm)                                                                      | $\zeta$ potential (mV) | ADP concentration (mg/mL) |                      | H12-PEG-Glu2C18 (mg/mL) | Endotoxin (EU/mL) |
|                                                                                |                        | inside of liposomes       | outside of liposomes |                         |                   |
| 153±42                                                                         | -10.3±1.0              | 0.066                     | 0.001                | 0.637                   | <3.1              |

(Total lipid concentration: 20 mg/mL) (n = 3, triplicated)
